# Supplementary material for: Self-assembly of monolayered lipid membranes for surface-coating of a nanoconfined Bombyx mori silk fibroin film
Source: Royal Society of Chemistry journal article supplement (doi:10.1039/c5ra09683a), 2015-01-01

## Self-assembly of Monolayered Lipid Membranes for Surface-coating of a Nanoconfined Bombyx Mori Silk Fibroin Film

Fan Xu,<sup>a</sup> Meimei Bao,<sup>b,c</sup> Longfei Rui,<sup>b,c</sup> Jiaojiao Liu,<sup>b,c</sup> Jingliang Li,<sup>e</sup> Yujiang Dou,<sup>d</sup> Kai Yang,<sup>b,c</sup> Bing Yuan,<sup>b,c,\*</sup> and Yuqiang Ma<sup>a,b,c,\*</sup>

## Supporting Information

Fig. S1 Contact angles of the unconfined silk fibroin film before and after treatment with methanol. The angles for (a) and (b) are  $73 \pm 3^\circ$  and  $81 \pm 3^\circ$ , respectively, obtained from 5 different places on the film.

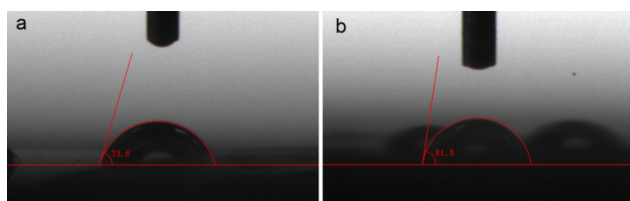

Fig. S2 Molecular structure of (a) DOPC, (b) DPPC and (c) MO lipids.

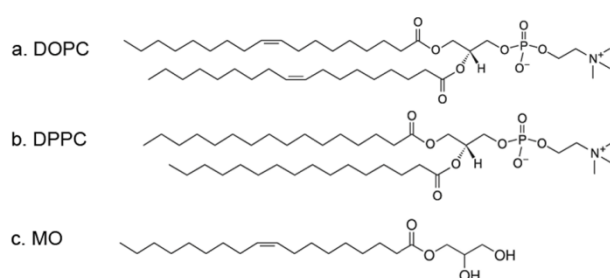

Fig. S3 (a), density of residual BSA protein after the films' immersion. (b-d), model images showing the cells adhered to the surface of a bare silk film (b), DOPC- (c) or DPPC-coated one (d).

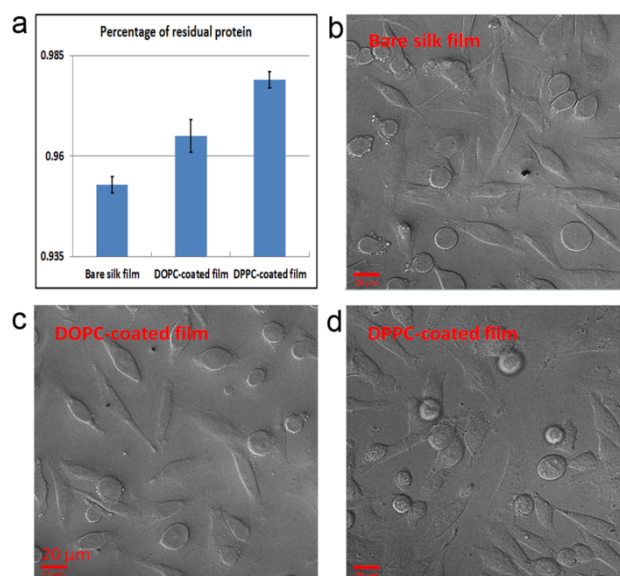

Supplement: c5ra09683a1.pdf [file c5ra09683a1.pdf]
